# Supplementary material for: A high-performance and self-powered polarization-sensitive photoelectrochemical-type Bi2O2Te photodetector based on a quasi-solid-state gel electrolyte
Source: Royal Society of Chemistry journal article supplement (doi:10.1039/d3mh01882b), 2024-01-01
Supplement: d3mh01882b1.pdf [file d3mh01882b1.pdf]

Supporting Information

**High-performance and self-powered polarization-sensitive photoelectrochemical-type  $\text{Bi}_2\text{O}_2\text{Te}$  photodetector based on quasi-solid-state gel electrolyte**

*Song Yang, Shujie Jiao,\* Yiyin Nie, Yue Zhao, Shiyong Gao, Dongbo Wang and*

*Jinzhong Wang*

School of materials science and engineering,

Harbin Institute of Technology, Harbin, 150001, China.

\*Email: shujiejiao@hit.edu.cn (S. Jiao)

**S1. SEM and AFM images of  $\text{Bi}_2\text{Te}_3$  nanosheets before phase transition**

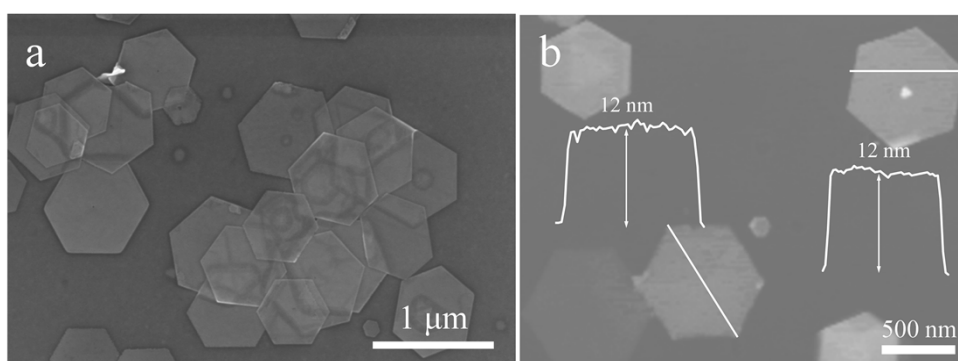

**Fig. S1** a) SEM and b) AFM images of  $\text{Bi}_2\text{Te}_3$  nanosheets before phase transition.

## S2. Optical image of Bi<sub>2</sub>O<sub>2</sub>Te nanosheets deposited on a silicon substrate

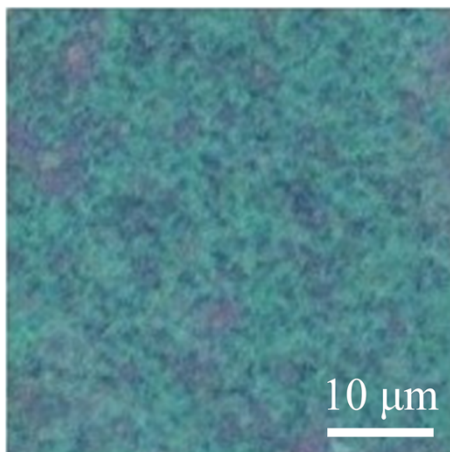

**Fig. S2 a)** Optical image of Bi<sub>2</sub>O<sub>2</sub>Te nanosheets deposited on a silicon substrate.

## S3. UV-Vis absorption spectrum of Bi<sub>2</sub>O<sub>2</sub>Te nanosheets

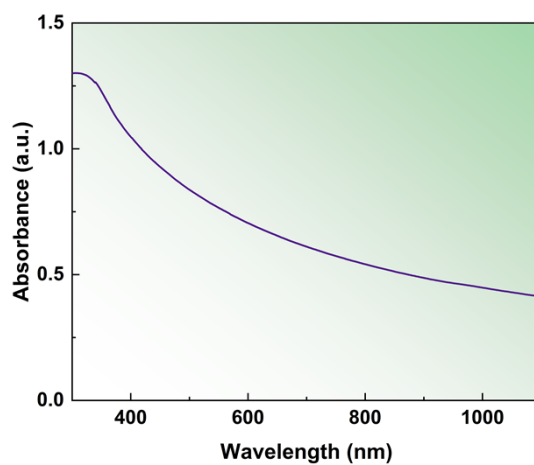

**Fig. S3** UV-Vis absorption spectrum of Bi<sub>2</sub>O<sub>2</sub>Te nanosheets.

As shown in Fig. S3, there is light absorption in the wavelength range from 300 to 1100 nm, suggesting the potential application of Bi<sub>2</sub>O<sub>2</sub>Te nanosheets in UV-Vis-NIR optoelectronic devices.

#### S4. Transient photocurrent spike investigation under different illumination intensities

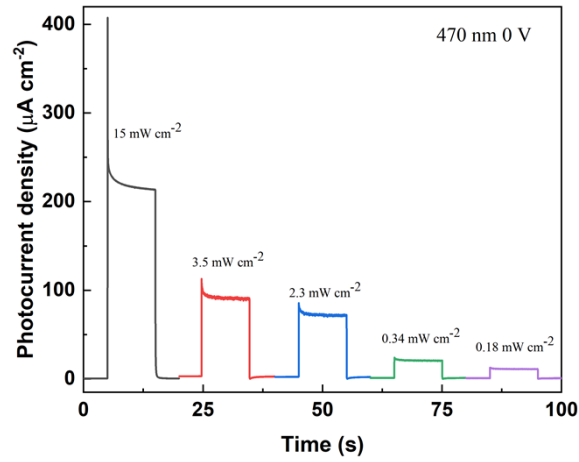

**Fig. S4** Photoresponse curves under 470 nm illumination with incident power densities ranging from 0.18 to 15  $\text{mW cm}^{-2}$ .

The photoresponse curves of the PEC-type  $\text{Bi}_2\text{O}_2\text{Te}$  photodetector under 470 nm illumination with different power densities are shown in Fig. S4. Clearly, the transient photocurrent spike of the PEC-type  $\text{Bi}_2\text{O}_2\text{Te}$  photodetector decreases significantly as the illumination power density decreases from 15 to 0.18  $\text{mW cm}^{-2}$ .

## S5. Photoresponse properties under pulsed light illumination with different frequencies

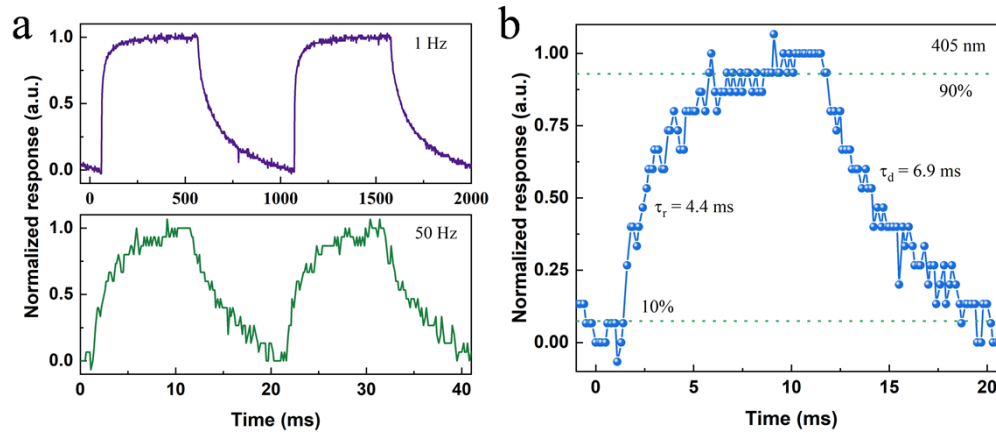

**Fig. S5** a) Photoresponse curves of PEC-type  $\text{Bi}_2\text{O}_2\text{Te}$  photodetectors under pulsed light (405 nm) illumination at frequencies of 1 Hz and 50 Hz. b) Response speed at a switching frequency of 50 Hz.

The response speed of PEC-type  $\text{Bi}_2\text{O}_2\text{Te}$  photodetector to rapidly changing optical signals was characterized by an oscilloscope. As shown in Fig. S5 b, the rise/fall times of the photodetector are 4.4/6.9 ms under 405 nm illumination at a frequency of 50 Hz.

### S6. Intensity of 520 nm laser at different polarization angles

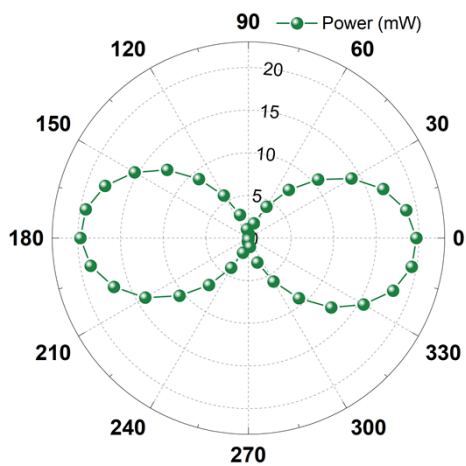

Fig. S6 Polar plot of the power of the 520 nm laser with different polarization angles.

### S7. Polarization-dependent photocurrents at different bias

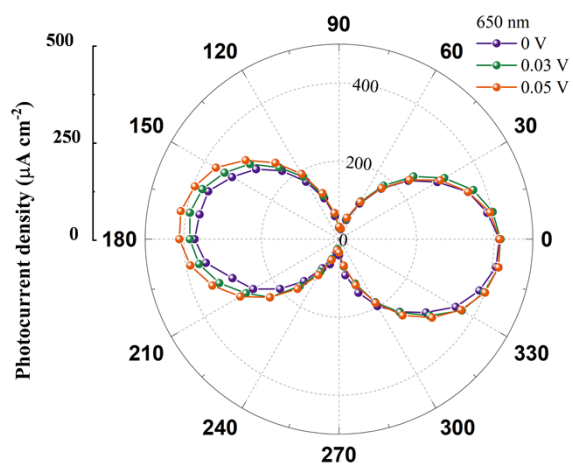

Fig. S7 Polar plot of polarization-dependent photocurrent of Bi<sub>2</sub>O<sub>2</sub>Te photodetector at different bias.
